# Supplementary material for: Novel variation at chr11p13 associated with cystic fibrosis lung disease severity
Source: PubMed Central journal article supplement — Hum Genome Var. 2016 Jul 7;3:16020–. doi: 10.1038/hgv.2016.20 (PMC4935763; doi:10.1038/hgv.2016.20), 2016-07-07
Supplement: hgv201620-s1.pdf [file hgv201620-s1.pdf]

## Supplementary Information

### Novel variation at chr11p13 associated with cystic fibrosis lung disease severity

Hong Dang<sup>1</sup>, Paul J. Gallins<sup>2</sup>, Rhonda G. Pace<sup>1</sup>, Xue-liang Guo<sup>1</sup>, Jaclyn R. Stonebraker<sup>1</sup>, Harriet Corvol<sup>3,4</sup>, Garry R. Cutting<sup>5,6</sup>, Mitchell L. Drumm<sup>7</sup>, Lisa J. Strug<sup>8,9</sup>, Michael R. Knowles<sup>1</sup>, and Wanda K. O'Neal<sup>1</sup>

<sup>1</sup> Marsico Lung Institute, University of North Carolina at Chapel Hill School of Medicine  
CF/Pulmonary Research and Treatment Center, Chapel Hill, NC 27599, USA

<sup>2</sup> Bioinformatics Research Center, North Carolina State University, Raleigh, NC 27607, USA

<sup>3</sup> Assistance Publique-Hôpitaux de Paris (AP-HP), Hôpital Trousseau, Pediatric Pulmonary  
Department; Institut National de la Santé et la Recherche Médicale (INSERM) U938, Paris  
75012, France

<sup>4</sup> Sorbonne Universités, Université Pierre et Marie Curie (UPMC) Paris 06, Paris 75005, France

<sup>5</sup> McKusick-Nathans Institute of Genetic Medicine, Johns Hopkins University School of  
Medicine, Baltimore, Maryland 21287, USA

<sup>6</sup> Department of Pediatrics, Johns Hopkins University School of Medicine, Baltimore, Maryland  
21287, USA

<sup>7</sup> Department of Pediatrics, School of Medicine, Case Western Reserve University, Cleveland,  
Ohio 44106, USA

<sup>8</sup> Program in Genetics and Genome Biology, The Hospital for Sick Children, Toronto, Ontario,  
Canada M5G 0A4

<sup>9</sup> Division of Biostatistics, Dalla Lana School of Public Health, University of Toronto, Toronto,  
Ontario, Canada M5T 3M7

Correspondence:

Hong Dang ([dangh@email.unc.edu](mailto:dangh@email.unc.edu))

919-966-2580

7209 Marsico Hall

CB#7248

University of North Carolina at Chapel Hill

Chapel Hill, NC 27599

Supplementary Table 1. Demographics of patients selected for resequencing

|                          | Study Group  | Subjects<br><i>n</i> | Enrollment Age (Yrs) |                   | Males<br>(%)        | European<br>(%)     |
|--------------------------|--------------|----------------------|----------------------|-------------------|---------------------|---------------------|
|                          |              |                      | Mean<br>( $\pm$ SD)  | Range             |                     |                     |
| ReSeqChr11               | Mild         | 191                  | 29.1 (10.2)          | 11.7 - 57.6       | 93 (48.7)           | 191 (100)           |
|                          | Severe       | 186                  | 15.5 (4.6)           | 8.0 - 34.9        | 96 (51.6)           | 186 (100)           |
|                          | <b>Total</b> | <b>377</b>           | <b>22.4 (10.5)</b>   | <b>8.0 - 57.6</b> | <b>189 (50.1)</b>   | <b>377 (100)</b>    |
| GWAS1+2 <sup>a</sup> All | <b>Total</b> | <b>6,365</b>         | <b>19.5 (9.4)</b>    | <b>6.0 - 62.2</b> | <b>3,368 (52.9)</b> | <b>6,079 (95.5)</b> |

<sup>a</sup>Corvol, et al., *Nat Commun*, 2015.

Supplementary Table 2. Summary of rare variant set tests for association with CF lung disease severity by SKAT test and Burden test<sup>a</sup>

| Set ID                | SNPs                |                                  | SKAT<br><i>P</i> value | Burden<br><i>P</i> value |
|-----------------------|---------------------|----------------------------------|------------------------|--------------------------|
|                       | ( <i>n</i> )<br>All | Markers per Test<br>( <i>n</i> ) |                        |                          |
| APIP exon             | 19                  | 19                               | 0.49                   | 0.67                     |
| APIP gene             | 221                 | 219                              | 0.36                   | 0.03                     |
| EHF exon              | 10                  | 8                                | 0.57                   | 0.05                     |
| EHF gene              | 180                 | 170                              | 0.58                   | 0.45                     |
| MIR1343 miRNA         | 1                   | 1                                | 0.26                   | 0.26                     |
| PDHX exon             | 14                  | 14                               | 0.20                   | 0.32                     |
| PDHX gene             | 309                 | 308                              | 0.90                   | 0.86                     |
| RP11-350D17.3 lincRNA | 4                   | 3                                | 0.60                   | 0.63                     |

<sup>a</sup>Wu, et al., *AJHG*, 2011.

Supplementary Table 3 can be found on the Human Genome Variation website (<http://www.nature.com/hgv>).

**Supplementary Table 4. Transcription Factor ChIP-seq factors from ENCODE for sequenced region from Figure 1L.**

ENCODE derived transcription factor confidence scores are defined as described in the methods of [http://genome.ucsc.edu/cgi-bin/hgTrackUi?hgsid=491641535\\_kyVVua7AaN7Pq4JuatQWgg283ubY&c=chr11&g=wgEncodeRegTfbsClusteredV3](http://genome.ucsc.edu/cgi-bin/hgTrackUi?hgsid=491641535_kyVVua7AaN7Pq4JuatQWgg283ubY&c=chr11&g=wgEncodeRegTfbsClusteredV3)

| chr   | chromosome start | chromosome end | name   | score |
|-------|------------------|----------------|--------|-------|
| chr11 | 34778471         | 34778898       | MYC    | 170   |
| chr11 | 34778568         | 34779095       | STAT3  | 1000  |
| chr11 | 34778571         | 34778827       | CEBPB  | 316   |
| chr11 | 34778585         | 34778885       | NR3C1  | 162   |
| chr11 | 34778619         | 34779159       | EP300  | 364   |
| chr11 | 34778621         | 34778889       | FOS    | 405   |
| chr11 | 34778687         | 34779097       | FOSL2  | 302   |
| chr11 | 34778758         | 34779054       | GATA3  | 260   |
| chr11 | 34778773         | 34779043       | FOXA1  | 186   |
| chr11 | 34778865         | 34779375       | POLR2A | 180   |
| chr11 | 34779737         | 34780493       | GATA2  | 429   |
| chr11 | 34779777         | 34780233       | CCNT2  | 148   |
| chr11 | 34779786         | 34780242       | JUND   | 370   |
| chr11 | 34779801         | 34780277       | STAT1  | 233   |
| chr11 | 34779812         | 34780252       | MYC    | 258   |
| chr11 | 34779823         | 34780193       | MAZ    | 163   |
| chr11 | 34779834         | 34780198       | TEAD4  | 872   |
| chr11 | 34779842         | 34780138       | RCOR1  | 296   |
| chr11 | 34779850         | 34780200       | STAT5A | 245   |
| chr11 | 34779856         | 34780172       | EP300  | 501   |
| chr11 | 34779858         | 34780062       | SPI1   | 201   |
| chr11 | 34779875         | 34780271       | MAX    | 247   |
| chr11 | 34779891         | 34780167       | TAL1   | 502   |
| chr11 | 34779948         | 34780378       | E2F6   | 144   |
| chr11 | 34792834         | 34793124       | MAFF   | 350   |
| chr11 | 34792839         | 34793121       | MAFK   | 628   |
| chr11 | 34794704         | 34795300       | TCF7L2 | 225   |
| chr11 | 34794829         | 34795159       | EP300  | 337   |
| chr11 | 34794892         | 34795132       | FOXA1  | 252   |
| chr11 | 34794900         | 34795065       | GATA3  | 1000  |
| chr11 | 34795375         | 34795705       | EP300  | 146   |
| chr11 | 34795436         | 34795732       | GATA3  | 265   |
| chr11 | 34796919         | 34797259       | RFX5   | 300   |
| chr11 | 34797031         | 34797255       | CEBPB  | 403   |
| chr11 | 34804857         | 34805137       | FOXA1  | 214   |
| chr11 | 34805377         | 34805927       | GATA2  | 214   |

| chr   | chromosome start | chromosome end | name  | score |
|-------|------------------|----------------|-------|-------|
| chr11 | 34805387         | 34805827       | TEAD4 | 221   |
| chr11 | 34805440         | 34805670       | CEBPB | 167   |
| chr11 | 34805469         | 34805851       | EP300 | 623   |
| chr11 | 34805477         | 34806303       | MYBL2 | 328   |
| chr11 | 34805529         | 34805865       | SP1   | 384   |
| chr11 | 34805565         | 34805861       | HNF4A | 183   |
| chr11 | 34805569         | 34806113       | NFIC  | 305   |
| chr11 | 34805569         | 34805825       | JUND  | 204   |
| chr11 | 34805578         | 34805778       | USF1  | 209   |
| chr11 | 34805593         | 34805809       | MEF2A | 173   |
| chr11 | 34805596         | 34805886       | JUN   | 139   |
| chr11 | 34805598         | 34805867       | RXRA  | 1000  |
| chr11 | 34805679         | 34805887       | FOXA2 | 572   |
| chr11 | 34805687         | 34805878       | FOXA1 | 713   |
| chr11 | 34806121         | 34806419       | EP300 | 1000  |
| chr11 | 34806126         | 34806426       | RXRA  | 206   |
| chr11 | 34806128         | 34806418       | HNF4G | 301   |
| chr11 | 34806133         | 34806355       | NFIC  | 379   |
| chr11 | 34806160         | 34806370       | FOXA1 | 629   |
| chr11 | 34806162         | 34806386       | RAD21 | 151   |
| chr11 | 34806166         | 34806374       | FOXA2 | 582   |
| chr11 | 34806180         | 34806435       | CEBPB | 394   |
| chr11 | 34806194         | 34806343       | SP1   | 383   |
| chr11 | 34806195         | 34806362       | HNF4A | 552   |
| chr11 | 34810366         | 34810606       | FOXA1 | 207   |
| chr11 | 34812065         | 34812565       | CTCF  | 691   |
| chr11 | 34812166         | 34812410       | RAD21 | 562   |
| chr11 | 34812175         | 34812435       | SMC3  | 219   |
| chr11 | 34813340         | 34813576       | BATF  | 186   |
| chr11 | 34813646         | 34814089       | CTCF  | 256   |
| chr11 | 34813731         | 34813971       | RAD21 | 166   |
| chr11 | 34814311         | 34814607       | GATA3 | 200   |
| chr11 | 34814318         | 34814642       | EP300 | 222   |
| chr11 | 34814323         | 34814613       | FOXA2 | 232   |
| chr11 | 34816268         | 34816608       | BACH1 | 413   |
| chr11 | 34816292         | 34816612       | MAFK  | 1000  |
| chr11 | 34816315         | 34816595       | MAFF  | 1000  |
| chr11 | 34816668         | 34816964       | GATA3 | 236   |
| chr11 | 34819068         | 34819508       | CBX3  | 327   |

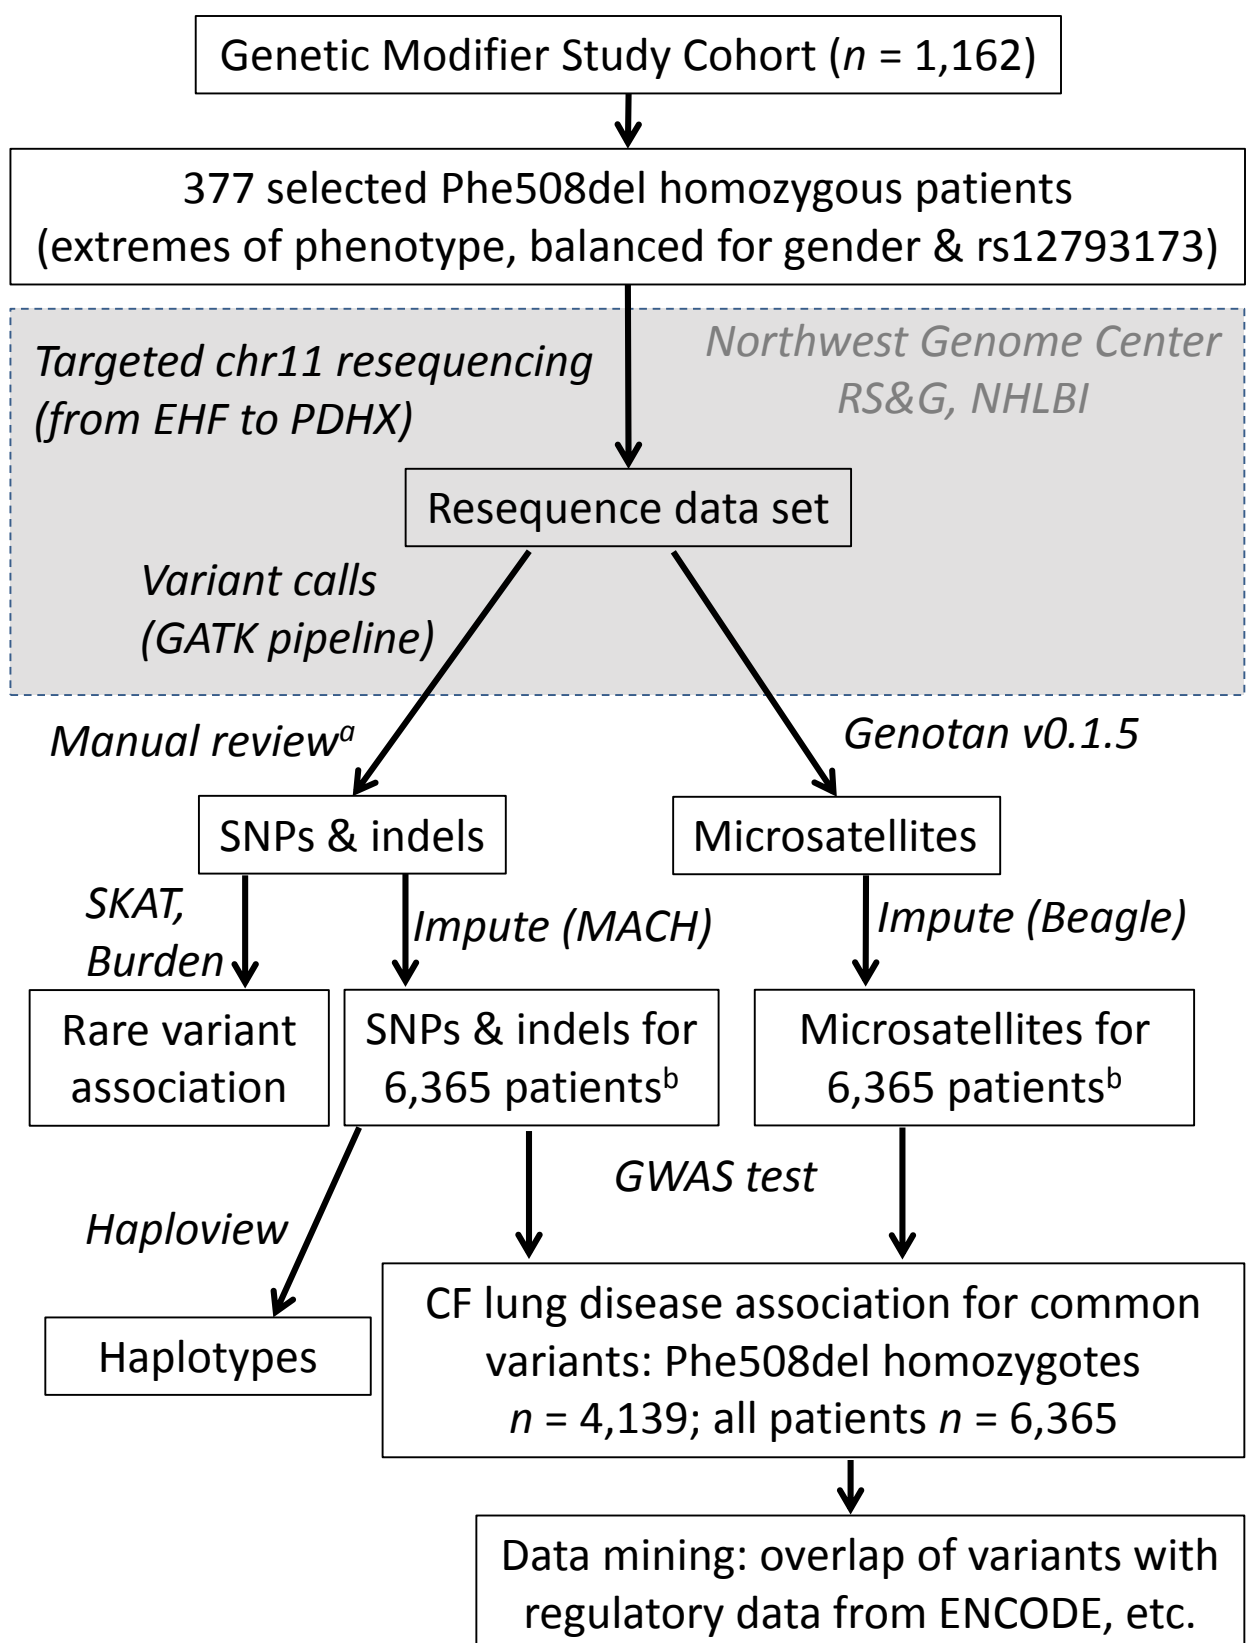

**Supplementary Figure 1. Flowchart of Experimental Design and Quality Control.**

<sup>a</sup>Especially for insertions/deletions (indels). <sup>b</sup>From the International CF Gene Modifier Consortium.

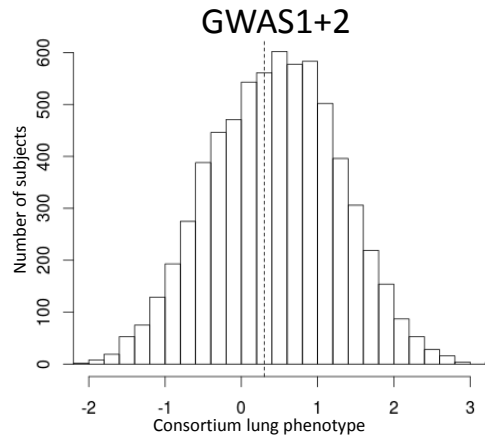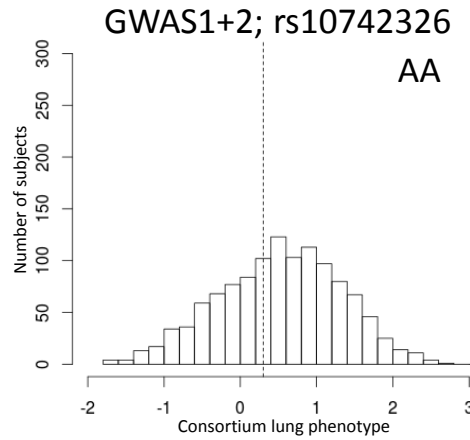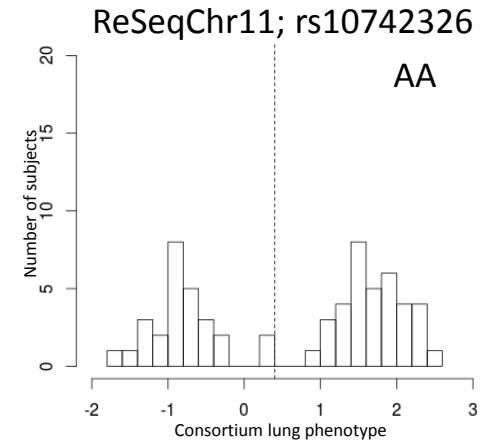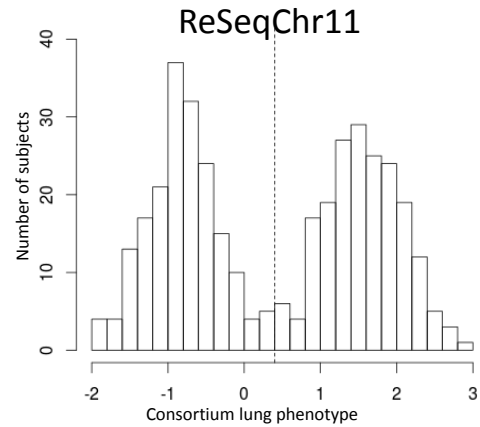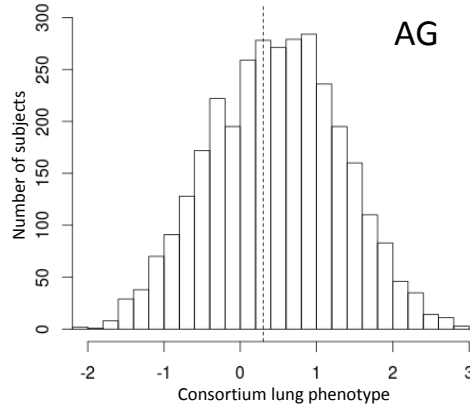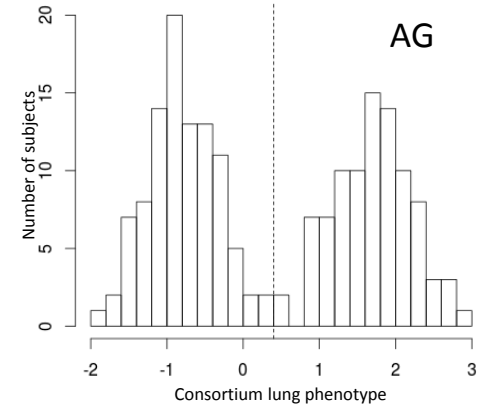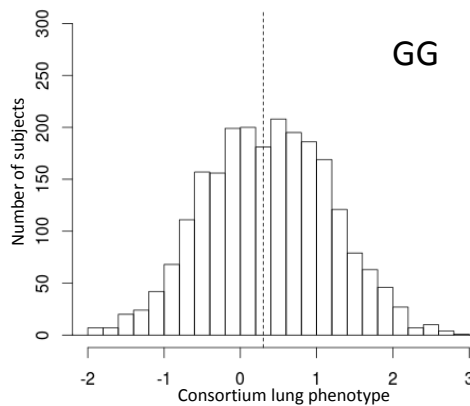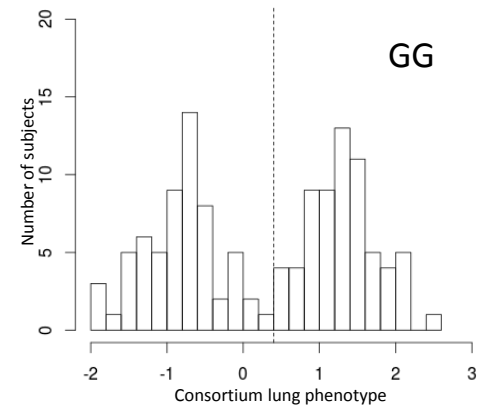

**Supplementary Figure 2. Consortium lung phenotype (KNoRMA) distributions among selected patients for targeted resequencing (ReSeqChr11) as compared to entire GWAS1+2 population.** Histograms of KNoRMA (Taylor, et al., *Pediatr Pulmonol*, 2011) distributions of lung function phenotypes [left upper panel for GWAS1+2 ( $n = 6,365$ ), left lower panel for ReSeqChr11 patients ( $n = 377$ )] are further broken down according to genotypes for top GWAS1+2 SNP (rs10742326), in GWAS1+2 patients (middle panels; Corvol, et al., *Nat Commun*, 2015) and in ReSeqChr11 subjects (right panels).



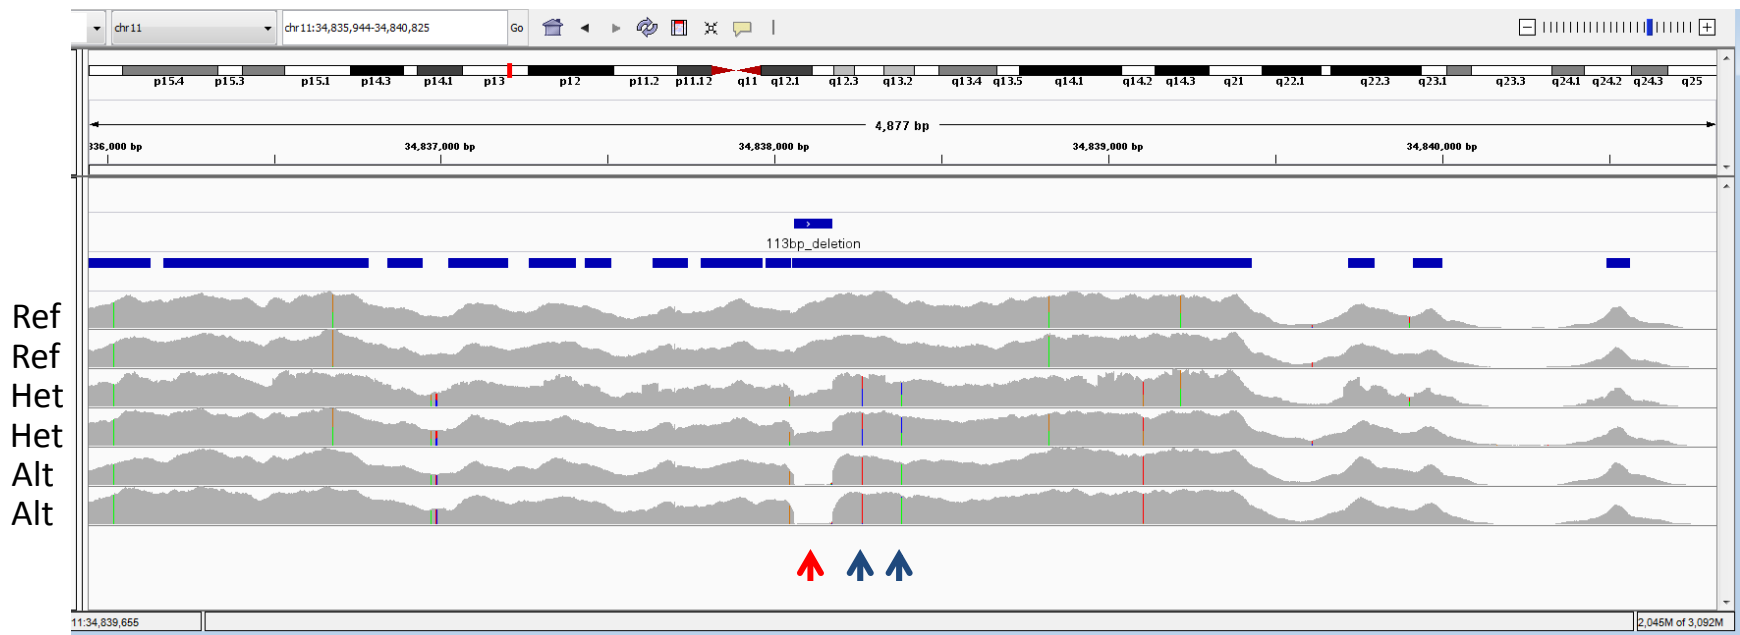

Del SNPs in LD

**Supplementary Figure 3. Example of resequencing coverage maps around 113 bp deletion.** Coverage tracks from six example sequence alignment and mapping results in BAM format were visualized in Integrative Genomics Viewer (IGV; Robinson, et al., *Nat Biotechnol*, 2011) genome browser. Grey mountain ranges show coverage from aligned sequence reads. Two samples each of homozygous reference (Ref), heterozygous (Het), and homozygous deletion (Alt) alleles of a 113 bp LINE element (red arrow), and two SNPs in LD (blue arrows) are shown.

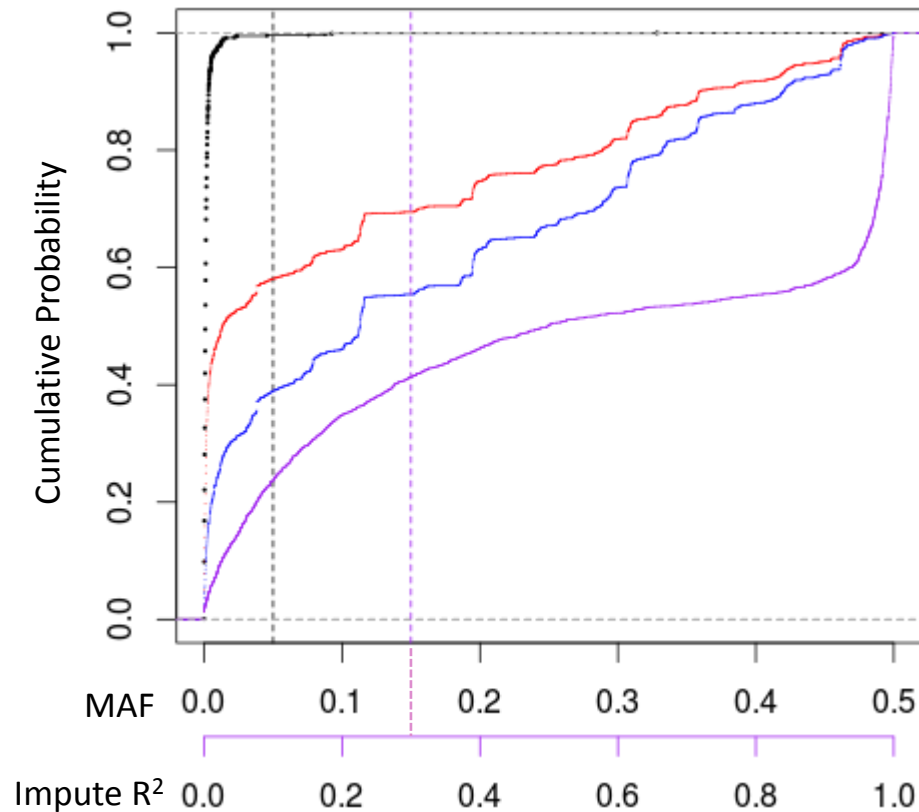

**Supplementary Figure 4. Empirical Cumulative Distribution Function (eCDF) plots of MAF and imputation quality among all SNPs/indels from the ReSeqChr11 project.** The minor allele frequencies (MAF; ranging from 0 – 0.5; X axis in black) of all variants (red dots) were plotted along the cumulative distribution (Y axis), while novel variants are marked by black dots. Known variants as defined by SNPs/indels with known dbSNP ID (rs number) are shown in blue dots. Vertical grey dashed line represents MAF = 0.05. Purple dots represent the cumulative distribution of variance imputation quality R<sup>2</sup> values (ranging from 0 – 1; X axis in purple). Vertical purple dashed line indicates R<sup>2</sup> value of 0.3 (typically accepted as quality threshold, above which the imputed variants are deemed of sufficient quality).

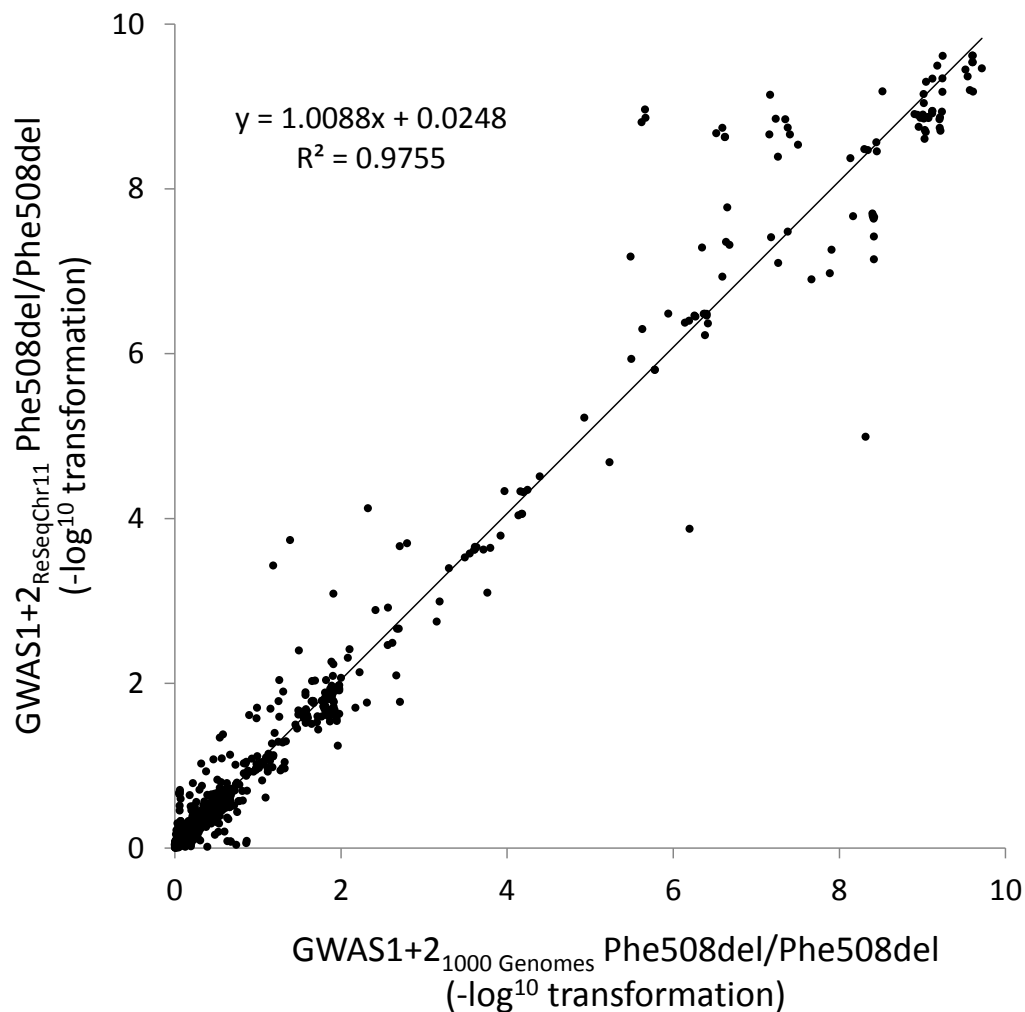

**Supplementary Figure 5. Comparison of CF lung disease association  $P$  values between GWAS1+2 (Corvol et al, 2015) and ReSeqChr11 imputed data.** CF lung disease severity association  $P$  values plotted compared to the earlier GWAS1+2 analysis (utilizing 1000 Genomes data for imputation; GWAS1+2<sub>1000 Genomes</sub>; Corvol et al. 2015) and newly imputed  $P$  values for those same patients, based on the results of the ReSeqChr11 resequencing data reported here (GWAS1+2<sub>ReSeqChr11</sub>) using 377 ReSeqChr11 subjects for imputation, after  $-\log_{10}$  transformation. Comparisons are for Phe508del homozygous ( $n = 4,139$ ) subjects.

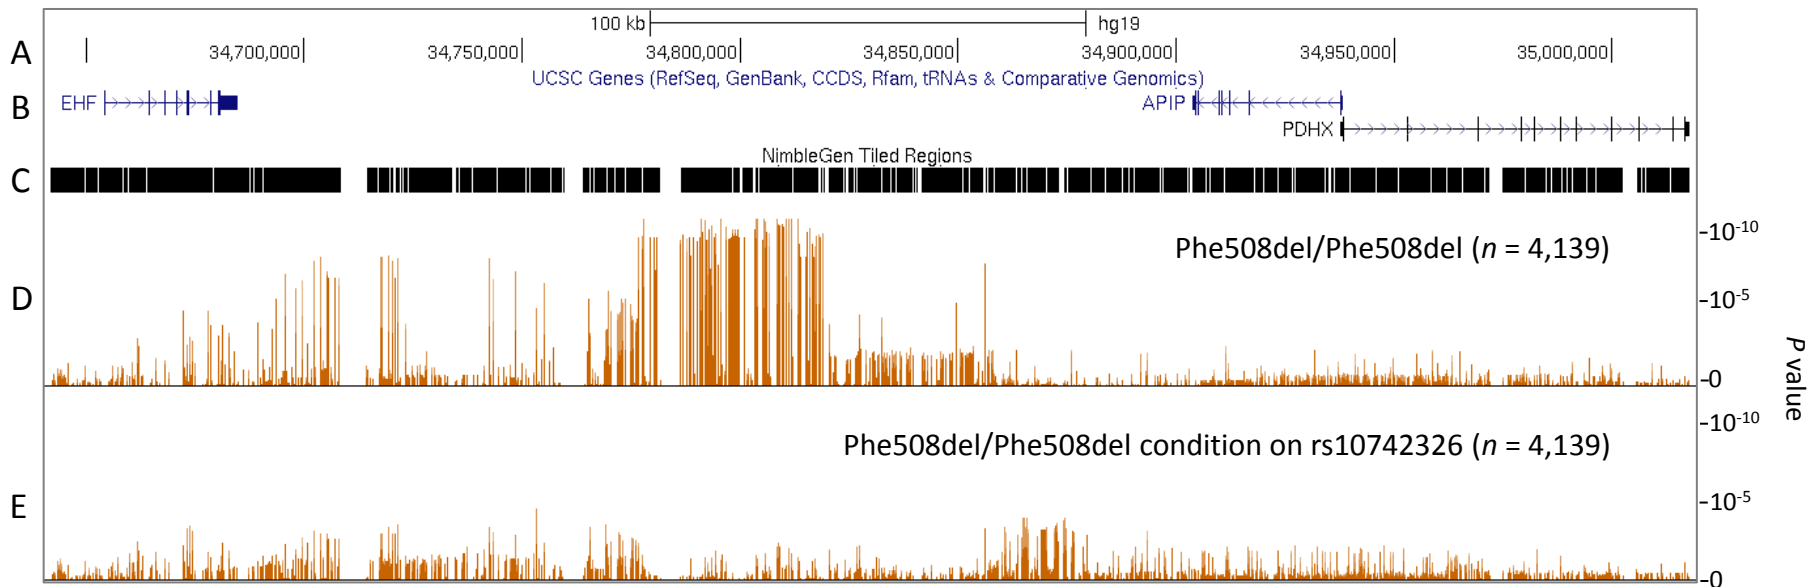

**Supplementary Figure 6. Summary of conditional analysis of CF lung disease association with rs10742326 genotypes as covariate.** Remaining CF lung disease association signals, after conditioning on rs10742326 genotype, were compared to signals from Phe508del homozygous patients using the UCSC genome browser. The tracks are: (A) Scale bar and genome coordinates on chr11 of UCSC hg19 reference genome; (B) UCSC genes annotation showing *EHF*, *APIP* and *PDHX* genomic structure; (C) Tiled region of NimbleGen probes used to enrich the local genomic DNA to be resequenced; (D) CF lung disease severity association *P* values for imputed SNPs/indels among Phe508del homozygous patients; (E) CF lung disease severity association *P* values after conditioning on rs10742326 genotype dosage; none of the SNPs ( $n = 3,496$ ) achieved regional significance after Bonferroni correction.
